# Supplementary material for: Endogenous opioids in the nucleus accumbens promote approach to high-fat food in the absence of caloric need
Source: eLife journal article supplement (doi:10.7554/elife.34955), 2018-03-26
Supplement: supp [file elife-34955-supp-v1.zip]

# Figure 1—figure supplement 2

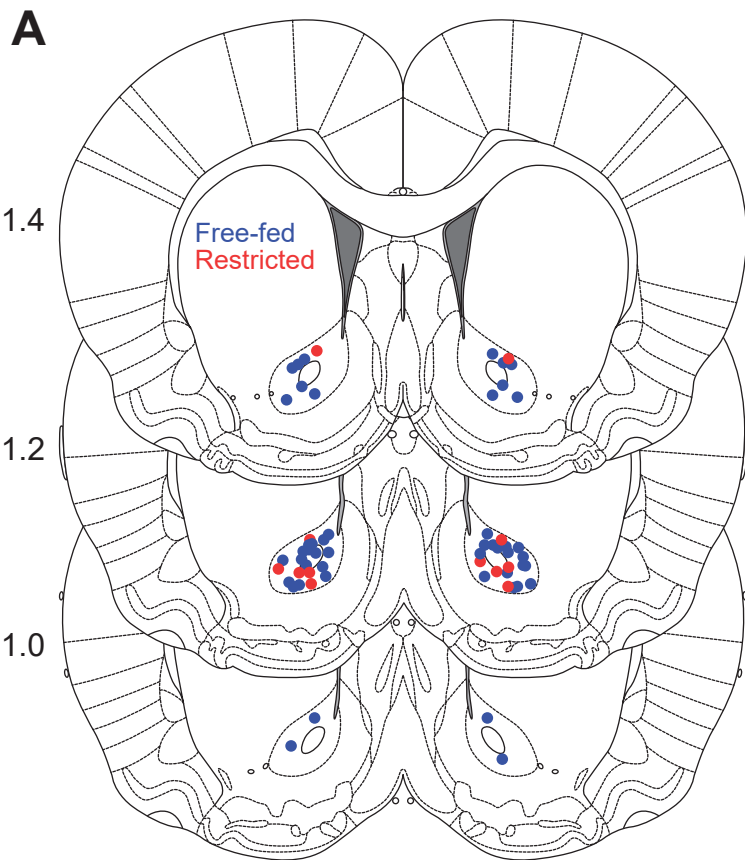

Pharmacology Experiments

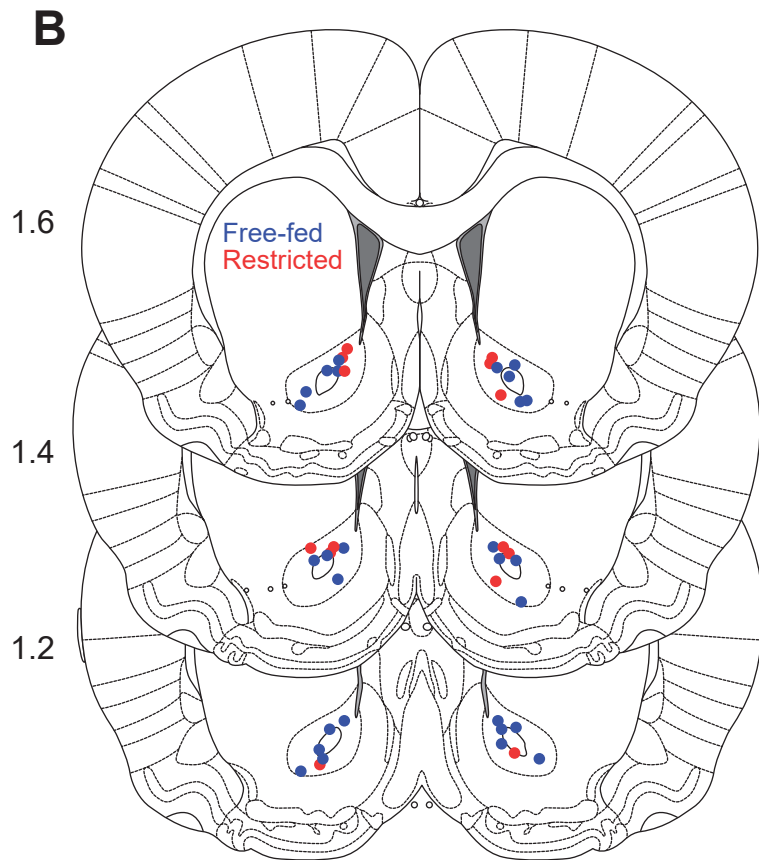

Electrophysiology/Pharmacology Experiments
