# Supplementary material for: Endogenous opioids in the nucleus accumbens promote approach to high-fat food in the absence of caloric need
Source: eLife journal article supplement (doi:10.7554/elife.34955), 2018-03-26
Supplement: supp [file elife-34955-supp-v1.zip]

Archive with 10 entries (10 files):
- elife_poa_e34955_Figure_1_figure_supplement_2.pdf
- elife_poa_e34955_Figure_8_figure_supplement_2.pdf
- elife_poa_e34955_Figure_1_figure_supplement_1.pdf
- elife_poa_e34955_Figure_2_figure_supplement_1.pdf
- elife_poa_e34955_Transparent_Reporting_File.docx
- elife_poa_e34955_Figure_4_figure_supplement_1.pdf
- elife_poa_e34955_Figure_2_figure_supplement_2.pdf
- elife_poa_e34955_Figure_5_figure_supplement_2.pdf
- elife_poa_e34955_Figure_5_figure_supplement_1.pdf
- elife_poa_e34955_Figure_8_figure_supplement_1.pdf
