# Supplementary material for: Endogenous opioids in the nucleus accumbens promote approach to high-fat food in the absence of caloric need
Source: eLife journal article supplement (doi:10.7554/elife.34955), 2018-03-26
Supplement: supp [file elife-34955-supp-v1.zip]

# Figure 2—figure supplement 1

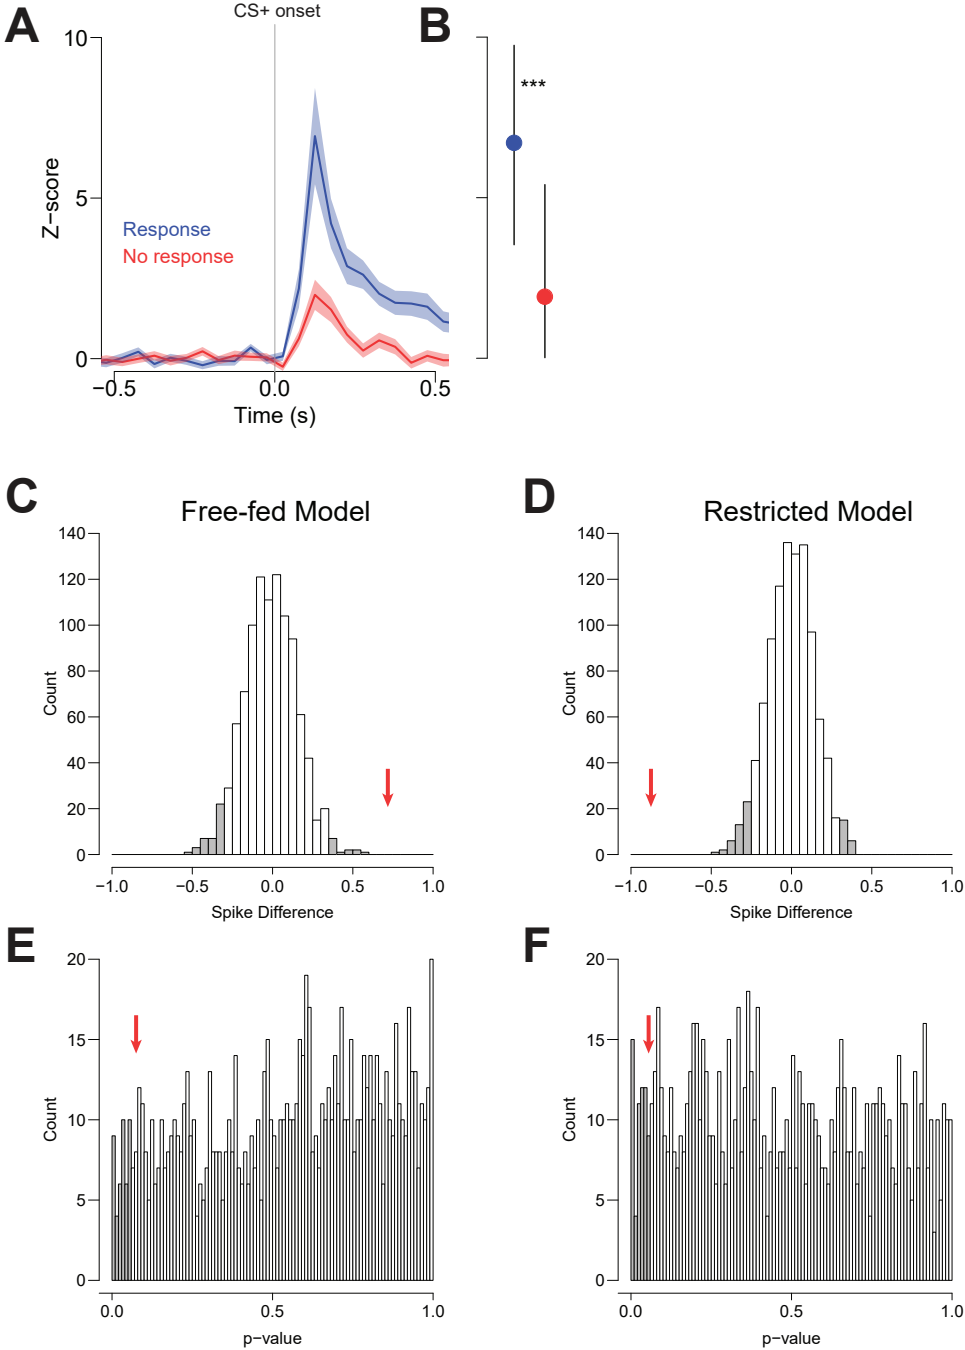

**G**

| Regressor                | Free-fed    |           | Restricted  |           |
|--------------------------|-------------|-----------|-------------|-----------|
|                          | Coefficient | p-value   | Coefficient | p-value   |
| Latency to max. speed    | 0.054       | 0.137     | -0.048      | **<0.01   |
| Distance from receptacle | -0.0131     | ***<0.001 | -0.005      | ***<0.001 |
| Average speed            | 0.01        | ***<0.001 | 0.01        | ***<0.001 |
| Constant                 | 1.164       | ***<0.001 | 1.311       | ***<0.001 |
