# Supplementary figures and images for: Endogenous opioids in the nucleus accumbens promote approach to high-fat food in the absence of caloric need
Source: eLife journal article supplement (doi:10.7554/elife.34955), 2018-03-26

# Figure 8—figure supplement 2

Sorted by pre-entry

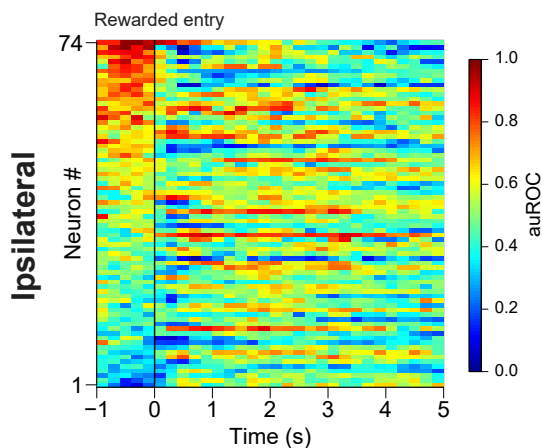

Sorted by cue-evoked

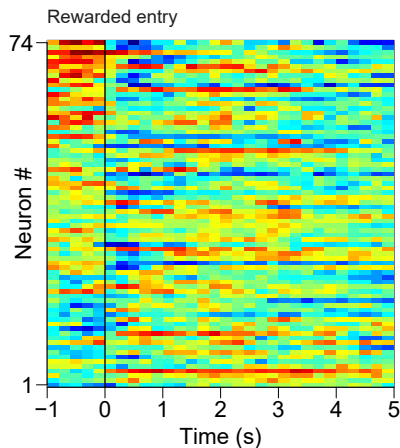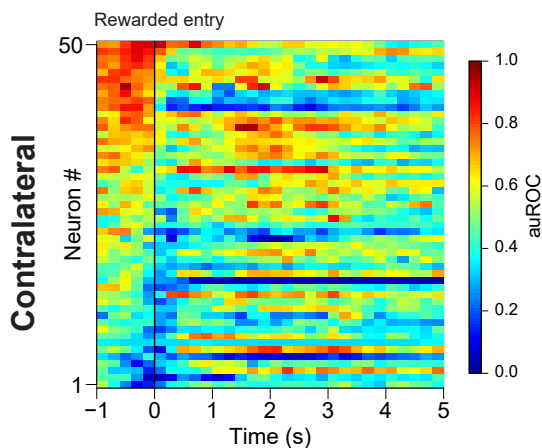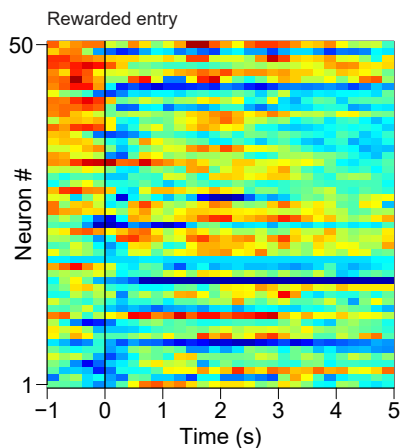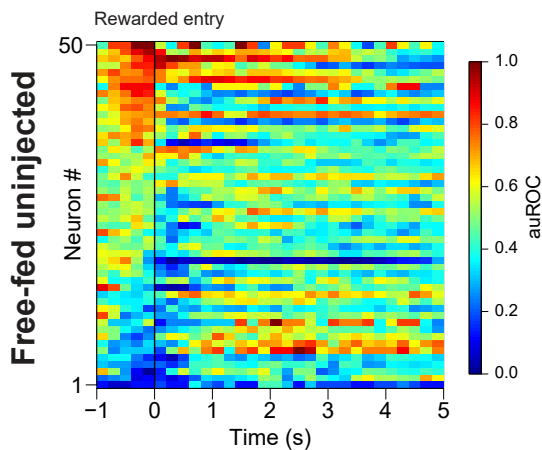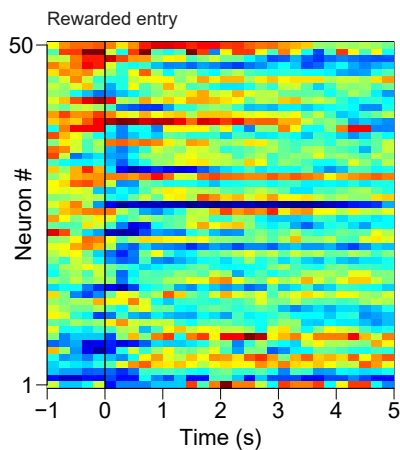

Supplement: supp [file elife-34955-supp-v1.zip]

# Figure 1—figure supplement 1

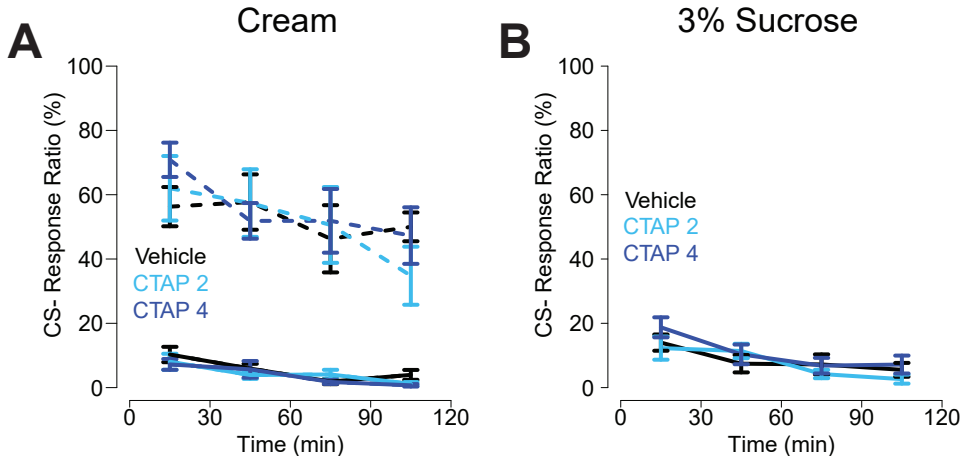

Supplement: supp [file elife-34955-supp-v1.zip › elife_poa_e34955_Figure_1_figure_supplement_1.pdf]

# Figure 4—figure supplement 1

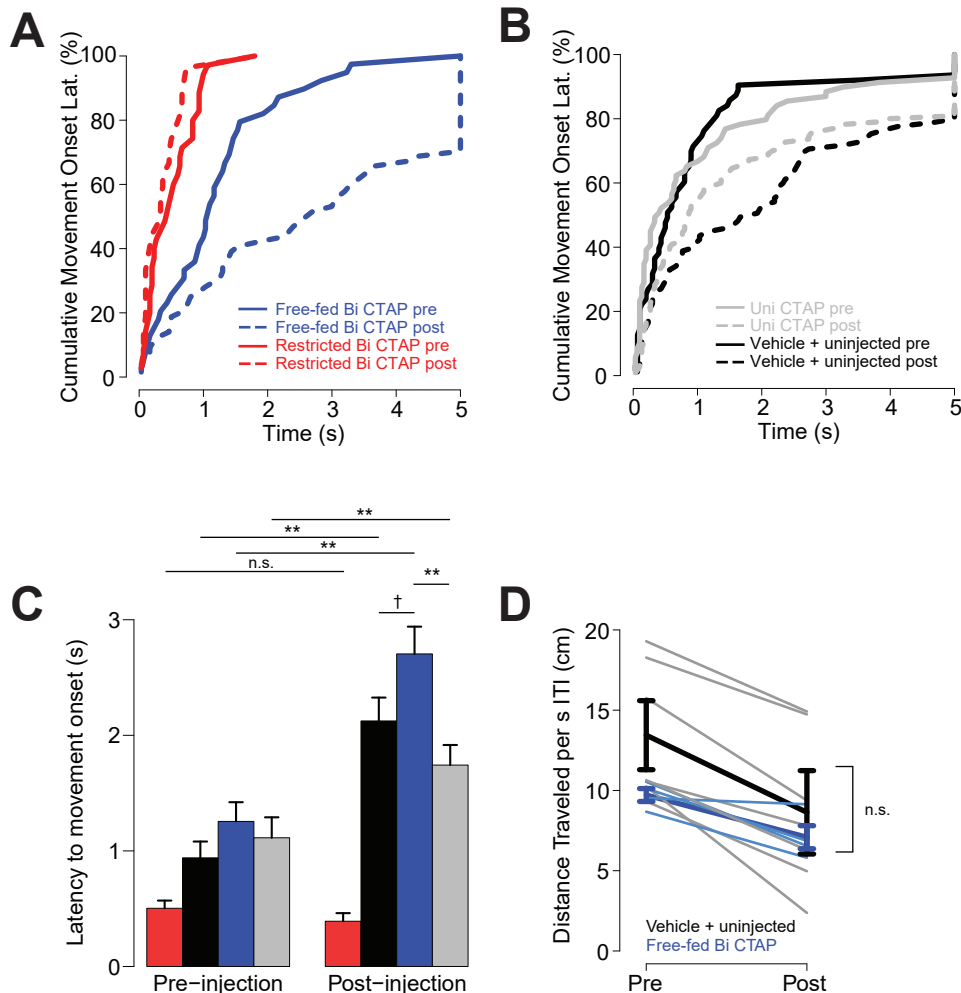

Supplement: supp [file elife-34955-supp-v1.zip › elife_poa_e34955_Figure_4_figure_supplement_1.pdf]

# Figure 2—figure supplement 2

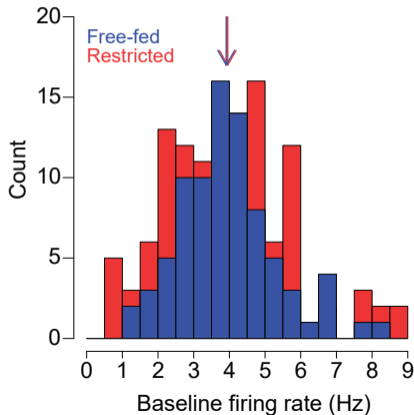

Supplement: supp [file elife-34955-supp-v1.zip › elife_poa_e34955_Figure_2_figure_supplement_2.pdf]

# Figure 5—figure supplement 2

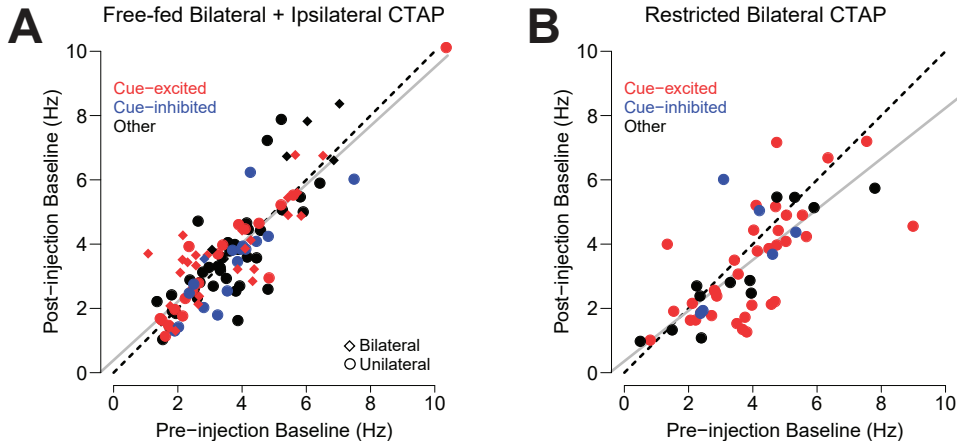

Supplement: supp [file elife-34955-supp-v1.zip › elife_poa_e34955_Figure_5_figure_supplement_2.pdf]

# Figure 5—figure supplement 1

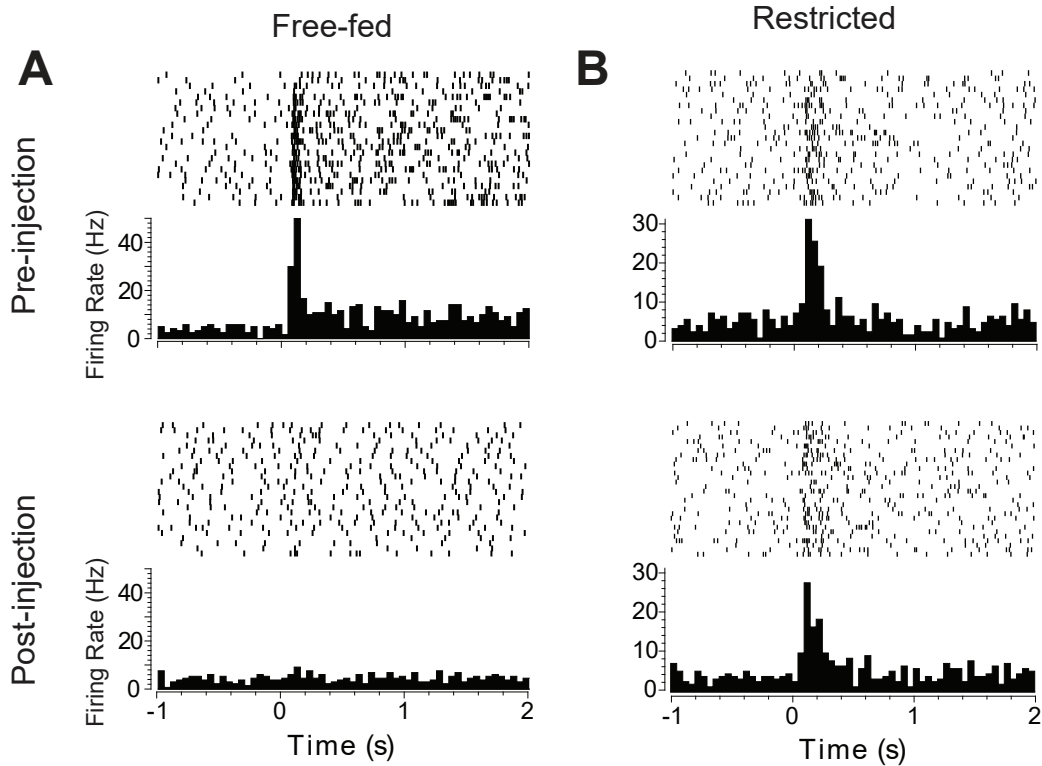

Supplement: supp [file elife-34955-supp-v1.zip › elife_poa_e34955_Figure_5_figure_supplement_1.pdf]

# Figure 8—figure supplement 1

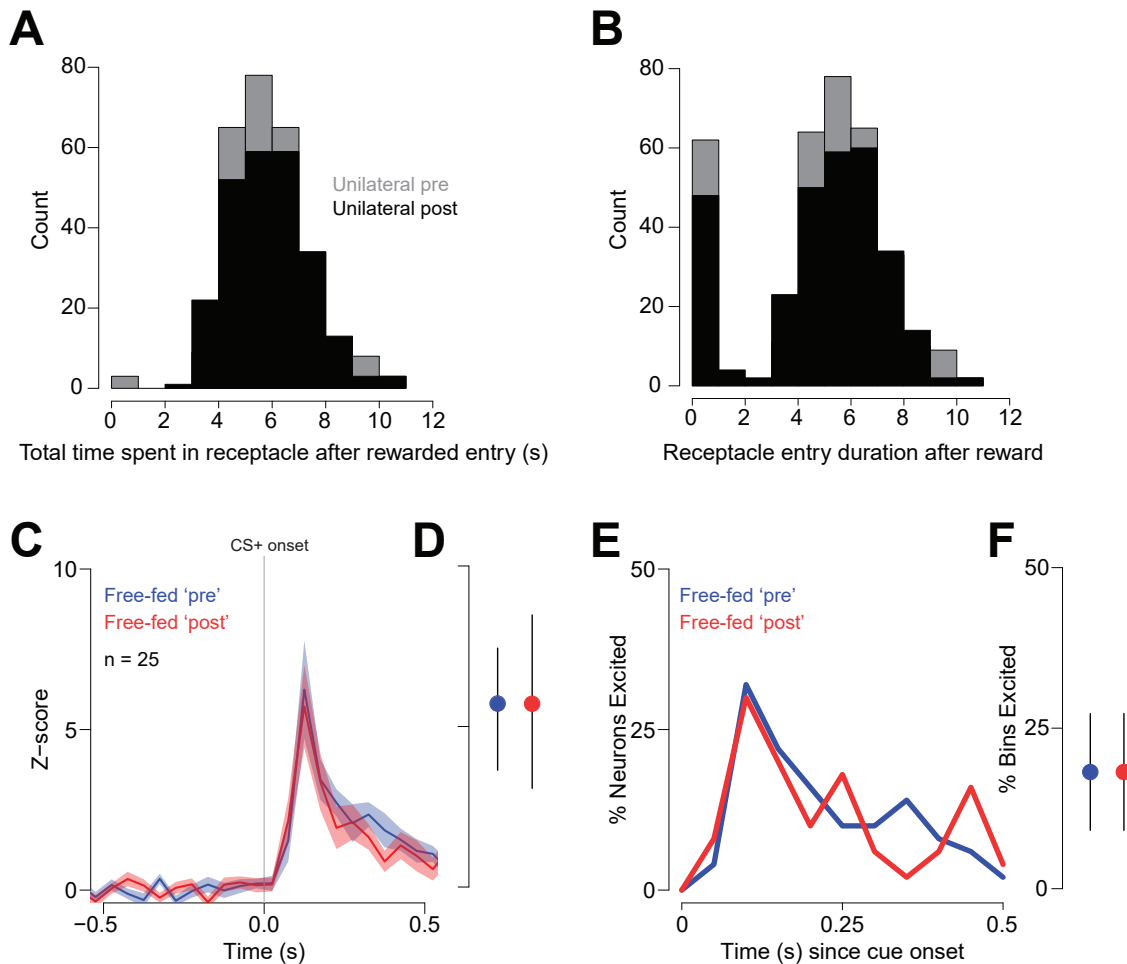

Supplement: supp [file elife-34955-supp-v1.zip › elife_poa_e34955_Figure_8_figure_supplement_1.pdf]
